# Supplementary material for: Generic Health Literacy Measurements for Adults: A Scoping Review
Source: PubMed Central journal article supplement (PMC7660647; doi:10.3390/ijerph17217768), 2020-10-23
Supplement: ijerph-17-07768-s001.pdf [file ijerph-17-07768-s001.pdf]

✧ **Medline**

Search results: *n* =1808

Search algorithm:

1. (health adj literacy).ti,ab.
2. (scale\* or instrument\* or tool\* or questionnaire\* or survey\* or screen\* or interview\* or measure\* or psychomet\* or assess\*).ti,ab.
3. (develop\* or validat\* or psychomet\* or factor analysis\* or reliability\* or validity\*).ti,ab.
4. 1 and 2 and 3
5. (review or systematic review or meta-analysis or scoping review).pt.
6. 4 not 5
7. limit 6 to (english language and yr="1990 -Current")

✧ **Embase**

Search results: *n* = 2767

Search algorithm:

1. (health adj literacy).ti,ab.
2. (scale\* or instrument\* or tool\* or questionnaire\* or survey\* or screen\* or interview\* or measure\* or psychomet\* or assess\*).ti,ab.
3. (develop\* or validat\* or psychomet\* or factor analysis\* or reliability\* or validity\*).ti,ab.
4. 1 and 2 and 3
5. (review or systematic review or meta-analysis or scoping review).pt.
6. 4 not 5
7. limit 6 to (english language and yr="1990 -Current")

✧ **Web of Science**

Search results: *n* = 3166

Search algorithm

|     |                           |                                                                                                                                                                                                                                                    |
|-----|---------------------------|----------------------------------------------------------------------------------------------------------------------------------------------------------------------------------------------------------------------------------------------------|
| # 4 | <a href="#">3,166</a>     | (#3) AND LANGUAGE: (English)<br><i>Indexes=SCI-EXPANDED, SSCI, A&amp;HCI, CPCI-S, CPCI-SSH, BKCI-S, BKCI-SSH, ESCI</i><br><i>Timespan=1990-2020</i>                                                                                                |
| # 3 | <a href="#">3,255</a>     | #1 NOT #2<br><i>Indexes=SCI-EXPANDED, SSCI, A&amp;HCI, CPCI-S, CPCI-SSH, BKCI-S, BKCI-SSH, ESCI</i><br><i>Timespan=All years</i>                                                                                                                   |
| # 2 | <a href="#">1,946,387</a> | DT=(review OR systematic review OR meta-analysis OR scoping review)<br><i>Indexes=SCI-EXPANDED, SSCI, A&amp;HCI, CPCI-S, CPCI-SSH, BKCI-S, BKCI-SSH, ESCI</i><br><i>Timespan=All years</i>                                                         |
| # 1 | <a href="#">3,478</a>     | TS=(("health literacy") AND (scale* OR instrument* OR tool* OR questionnaire* OR survey* OR screen* OR interview* OR measure* OR psychomet* OR assess*) AND (develop* OR validat* OR psychomet* OR factor analysis* OR reliability* OR validity*)) |

|  |                                                                                                                     |
|--|---------------------------------------------------------------------------------------------------------------------|
|  | <i>Indexes=SCI-EXPANDED, SSCI, A&amp;HCI, CPCI-S, CPCI-SSH, BKCI-S, BKCI-SSH, ESCI</i><br><i>Timespan=All years</i> |
|--|---------------------------------------------------------------------------------------------------------------------|

### \* Scopus

Search results:  $n = 1181$

Search algorithm:

TITLE-ABS ((health AND literacy) AND (scale\* OR instrument\* OR tool\* OR questionnaire\* OR survey\* OR screen\* OR interview\* OR measure\* OR psychomet\* OR assess\*) AND (develop\* OR validat\* OR psychomet\* OR factor AND analysis\* OR reliability\* OR validity\*)) AND (EXCLUDE (DOCTYPE , "re")) AND (EXCLUDE (PUBYEAR , 1989) OR EXCLUDE (PUBYEAR , 1988) OR EXCLUDE (PUBYEAR , 1986) OR EXCLUDE (PUBYEAR ,1985) OR EXCLUDE (PUBYEAR ,1982) OR EXCLUDE (PUBYEAR , 1980) OR EXCLUDE (PUBYEAR, 1977) OR EXCLUDE (PUBYEAR, 1974)) AND (LIMIT-TO ( ACCESSTYPE(OA) )) AND (LIMIT-TO (LANGUAGE , "English" ) ).
